# Supplementary material for: Charge-reversal plug gate nanovalves on peptide-functionalized mesoporous silica nanoparticles for targeted drug delivery
Source: Royal Society of Chemistry journal article supplement (doi:10.1039/c3tb20792g), 2013-01-01
Supplement: c3tb20792g.pdf [file c3tb20792g.pdf]

## **Electronic Supplementary Information (ESI)**

*of*

### **Charge-Reversal Plug Gate Nanovalves on Peptide-Functionalized Mesoporous Silica Nanoparticles for Targeted Drug Delivery**

Guo-Feng Luo, Wei-Hai Chen, Yun Liu, Jing Zhang, Si-Xue Cheng, Ren-Xi Zhuo  
and Xian-Zheng Zhang\*

Key Laboratory of Biomedical Polymers of Ministry of Education & Department of  
Chemistry, Wuhan University, Wuhan 430072, P. R. China

**Table S1.** BET and BJH parameters of different nanoparticles.

| Sample                                                     | BET surface area<br>$S_{\text{BET}}$ (m <sup>2</sup> /g) | Pore volume<br>$V_p$ (cm <sup>3</sup> /g) | BJH pore diameter<br>$W_{\text{BJH}}$ (Å) |
|------------------------------------------------------------|----------------------------------------------------------|-------------------------------------------|-------------------------------------------|
| MCM-41                                                     | 1057.53                                                  | 1.14                                      | 33.51                                     |
| MSN-alkyne                                                 | 802.50                                                   | 0.89                                      | 31.92                                     |
| MSN-K <sub>8</sub> (Cit)                                   | 526.13                                                   | 0.47                                      | 29.92                                     |
| MSN-K <sub>8</sub> (Cit)/K <sub>8</sub> (RGD) <sub>2</sub> | 92.92                                                    | /                                         | /                                         |

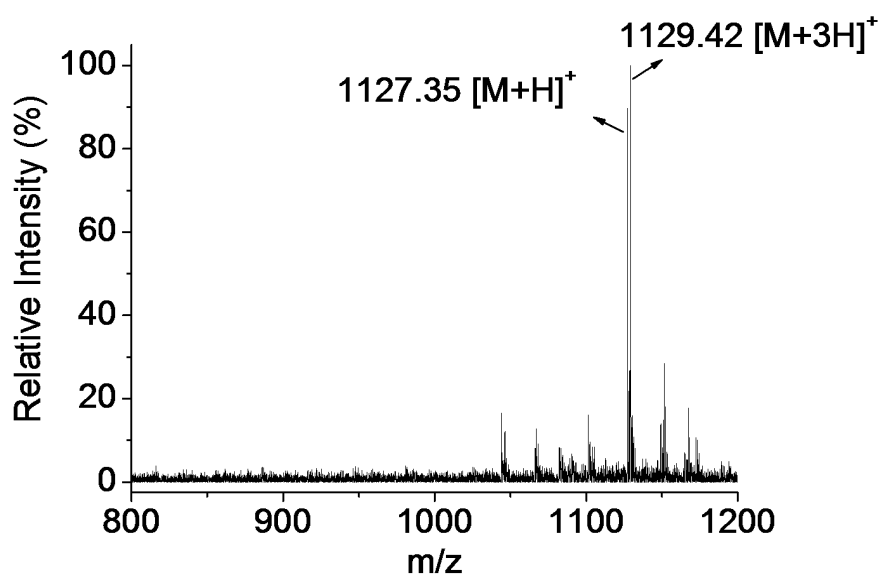

**Fig. S1** MOLDI-TOF spectrum of K<sub>8</sub>-azide.

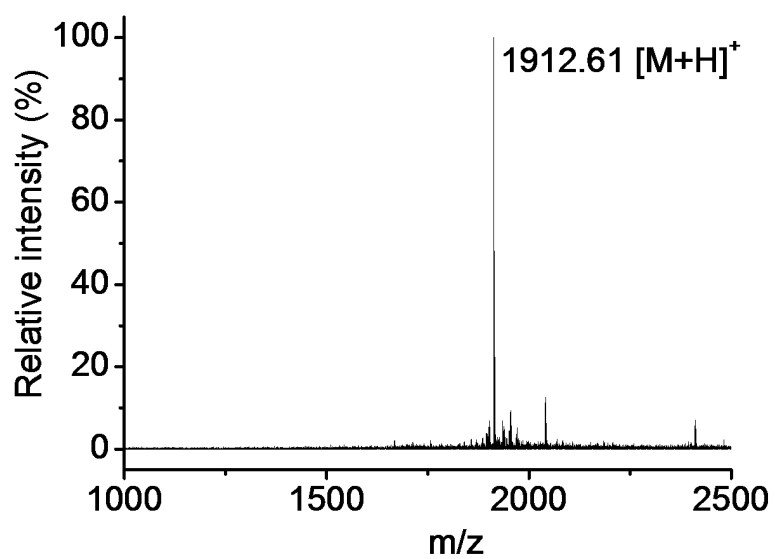

**Fig. S2** MOLDI-TOF spectrum of  $K_8(RGD)_2$ .

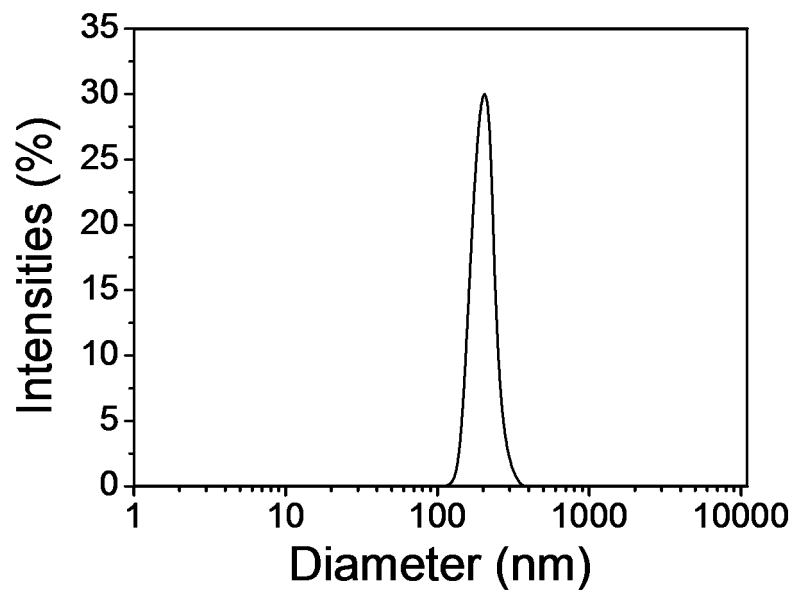

**Fig. S3** Particle size and size distribution of MCM-41 in PBS (pH 7.4, 10 mM) at 37 °C.

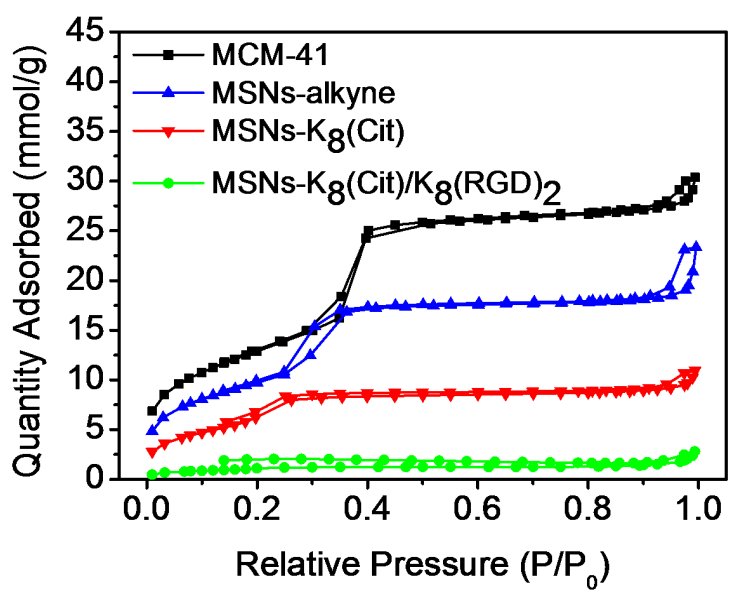

**Fig. S4** Brunauer-Emmett-Teller (BET) nitrogen adsorption/desorption isotherms of MCM-41, MSN-alkyne, MSN-K<sub>8</sub>(Cit), and MSN-K<sub>8</sub>(Cit)/K<sub>8</sub>(RGD)<sub>2</sub>

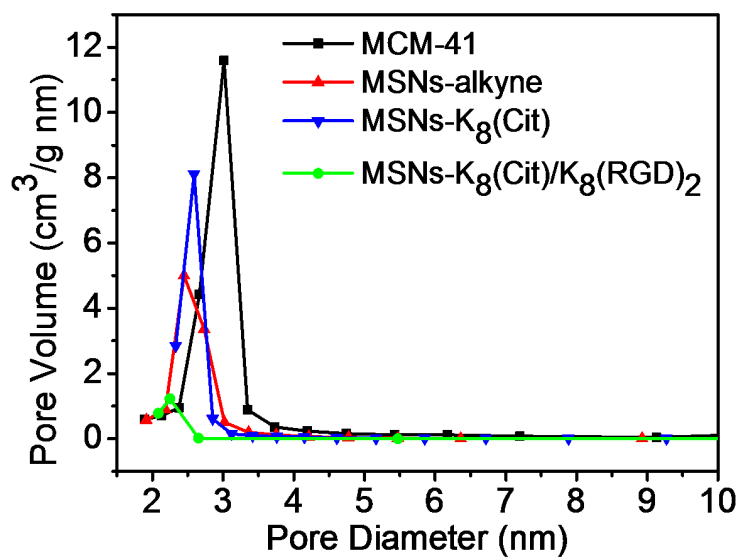

**Fig. S5** Barrett-Joyner-Halenda (BJH) pore size distribution of MCM-41, MSN-alkyne, MSN-K<sub>8</sub>(Cit), and MSN-K<sub>8</sub>(Cit)/K<sub>8</sub>(RGD)<sub>2</sub>.

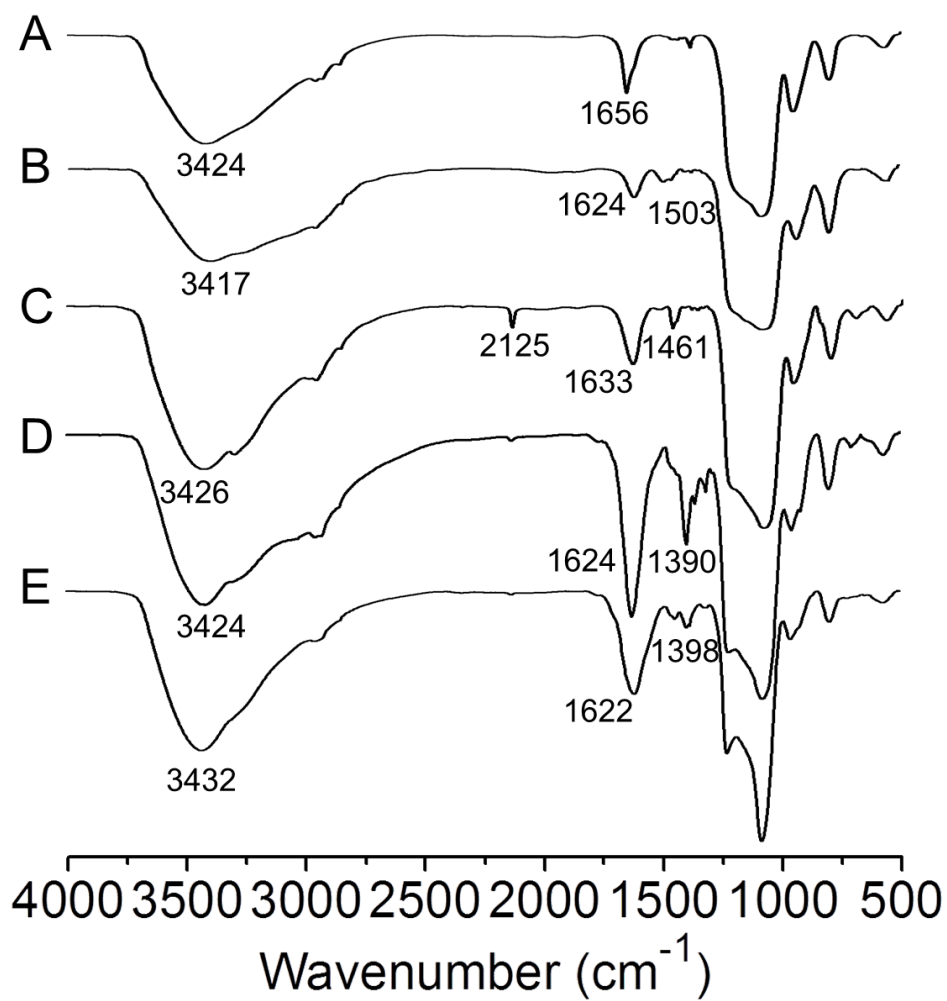

**Fig. S6** FT-IR spectra of MCM-41(A), MSN-NH<sub>2</sub> (B), MSN-alkyne (C), MSN-K<sub>8</sub> (D),  
and MSN-K<sub>8</sub>(Cit) (E).



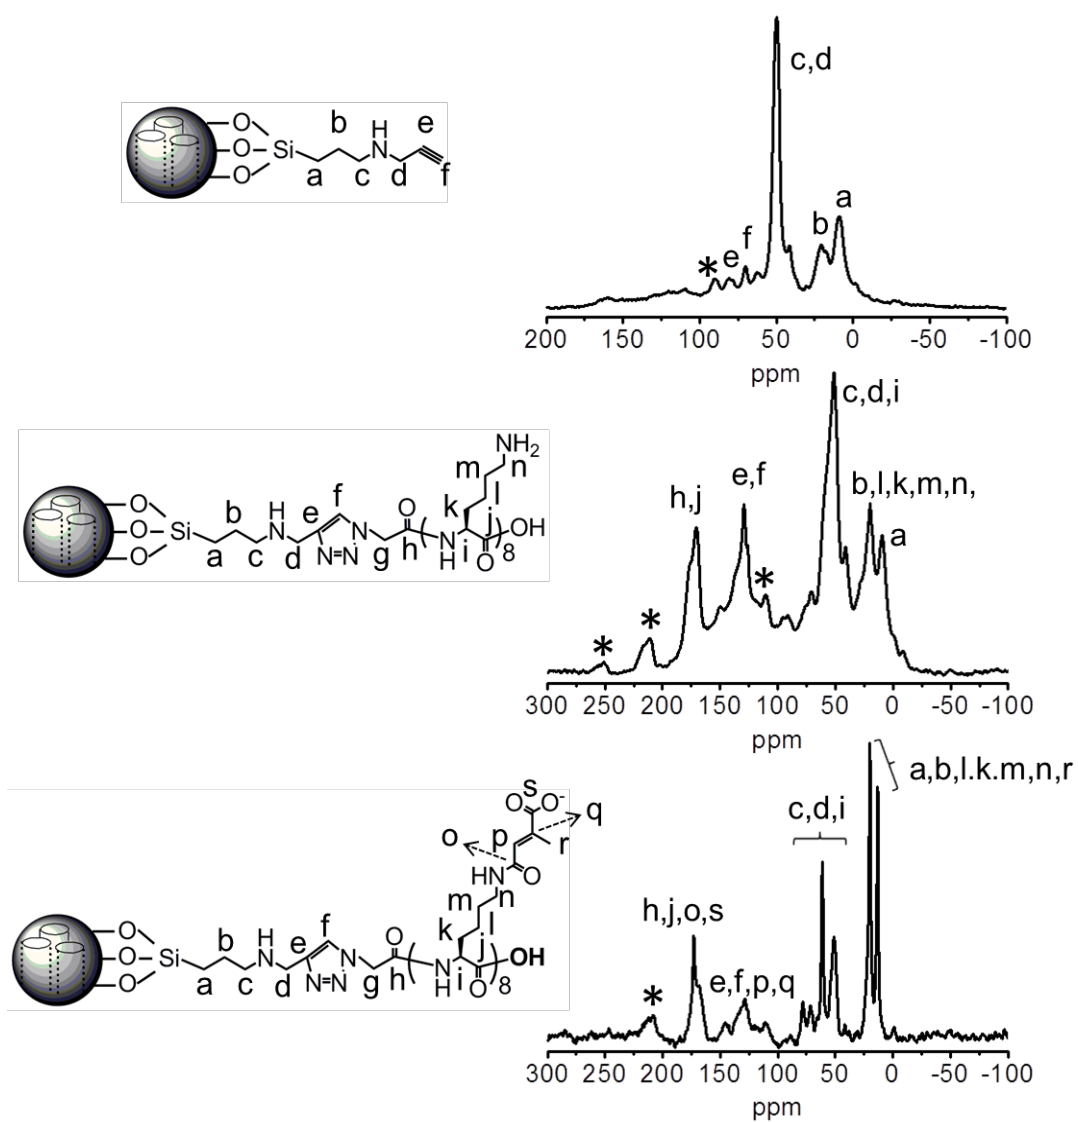

**Fig. S7**  $^{13}\text{C}$  CP/MAS NMR spectra of MSN-alkyne, MSN-K<sub>8</sub>, and MSN-K<sub>8</sub>(Cit). (\* are spinning side bands)

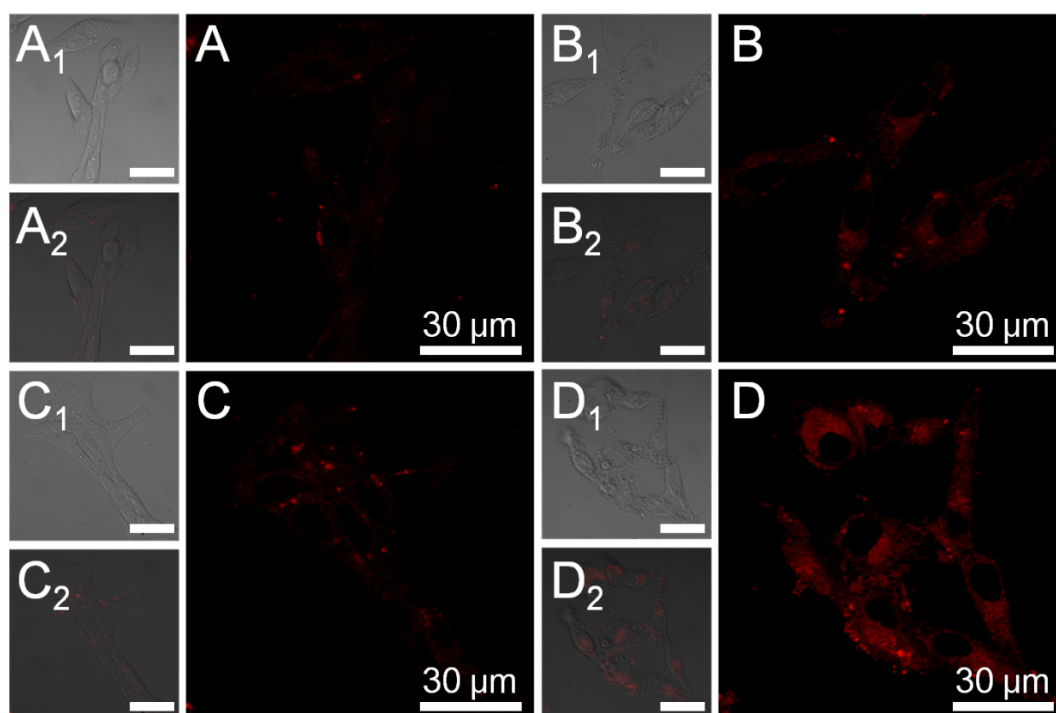

**Fig. S8** CLSM images of COS7 (A, C) and U87 MG cells (B, D) treated by DOX@MSN-K<sub>8</sub>(Cit)/K<sub>8</sub> (A, B) and DOX@MSN-K<sub>8</sub>(Cit)/K<sub>8</sub>(RGD)<sub>2</sub> (C,D) for 1 h.
